# Supplementary material for: Telomere DNA damage signaling regulates cancer stem cell evolution, epithelial mesenchymal transition, and metastasis
Source: PubMed Central journal article supplement (PMC5655185; doi:10.18632/oncotarget.20960), 2017-09-16
Supplement: oncotarget-08-80139-s001.pdf [file oncotarget-08-80139-s001.pdf]

# Telomere DNA damage signaling regulates cancer stem cell evolution, epithelial mesenchymal transition, and metastasis

## SUPPLEMENTARY MATERIALS

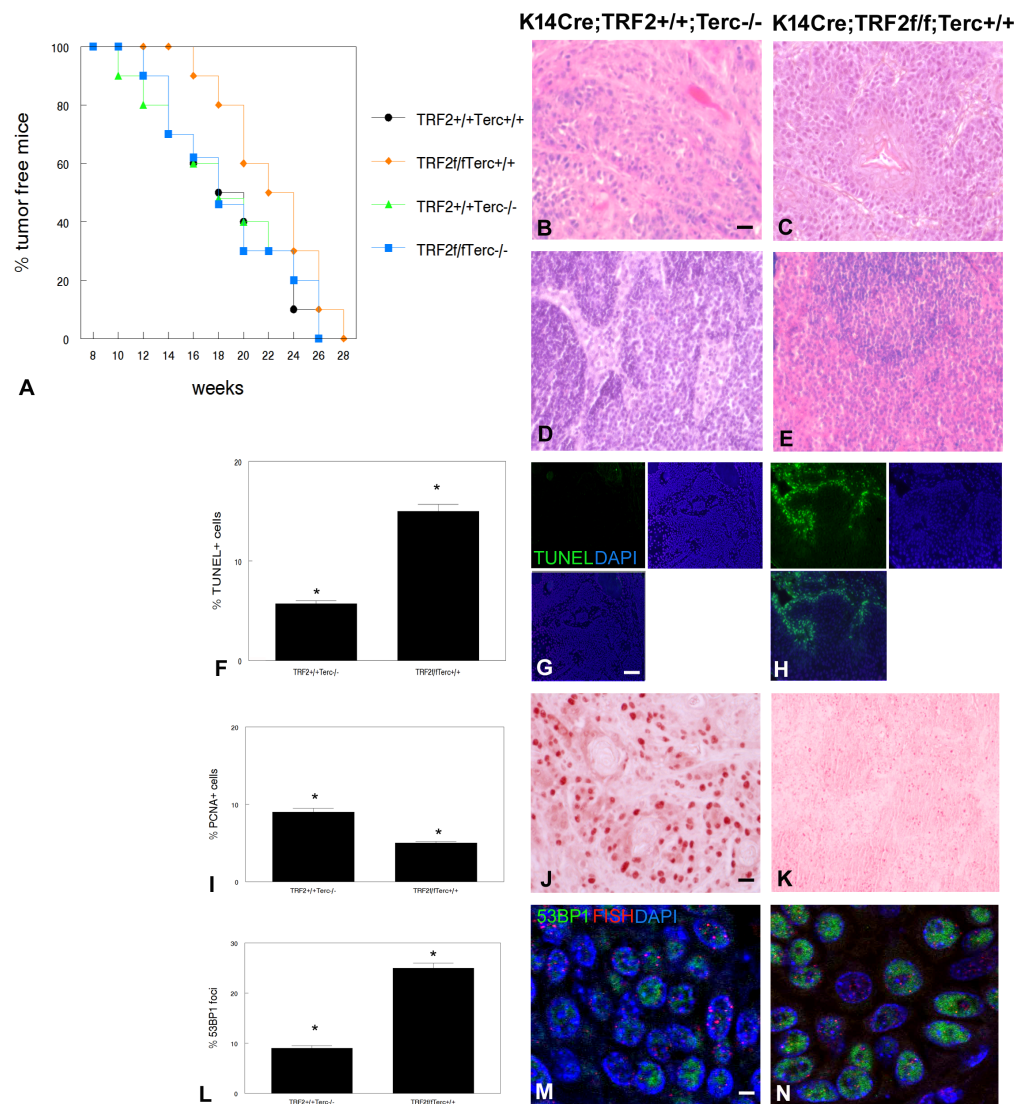

**Supplementary Figure 1: Increased latency in K14Cre;TRF2f/f;Terc+/+ SCC.** (A) Tumor latency of K14Cre;TRF2<sup>+/+</sup>;Terc<sup>+/+</sup>, K14Cre;TRF2<sup>f/f</sup>;Terc<sup>+/+</sup>, K14Cre;TRF2<sup>+/+</sup>;Terc<sup>-/-</sup>, and K14Cre;TRF2<sup>f/f</sup>;Terc<sup>-/-</sup> SCC. Percent tumor free mice and weeks tumor latency are shown. Histopathology of primary SCC from K14Cre;TRF2<sup>+/+</sup>;Terc<sup>-/-</sup> (B) and K14Cre;TRF2<sup>f/f</sup>;Terc<sup>+/+</sup> (C) mice is shown by H&E staining. Scale bar = 10  $\mu$ m. Histopathology of metastatic SCC from K14Cre;TRF2<sup>+/+</sup>;Terc<sup>-/-</sup> (D) and K14Cre;TRF2<sup>f/f</sup>;Terc<sup>+/+</sup> (E) mice is shown by H&E staining. Apoptotic cells in primary SCC from K14Cre;TRF2<sup>+/+</sup>;Terc<sup>-/-</sup> (G) and K14Cre;TRF2<sup>f/f</sup>;Terc<sup>+/+</sup> (H) mice are shown by TUNEL assay and quantitated in (F). Scale bar = 10  $\mu$ m. Proliferating cells were detected in K14Cre;TRF2<sup>+/+</sup>;Terc<sup>-/-</sup> (J) and K14Cre;TRF2<sup>f/f</sup>;Terc<sup>+/+</sup> (K) primary SCC by PCNA immunohistochemistry and quantitated in (I). Co-localization of 53BP1 (shown by immunofluorescence, AlexaFluor 488) at telomeres (shown by fluorescence in situ hybridization, Cy3) in histopathologic sections from K14Cre;TRF2<sup>+/+</sup>;Terc<sup>-/-</sup> (M) and K14Cre;TRF2<sup>f/f</sup>;Terc<sup>+/+</sup> (N) primary SCC and quantitated in (L). Error bars indicate SEM. Nuclei were counterstained with DAPI. Scale bar = 5  $\mu$ m.

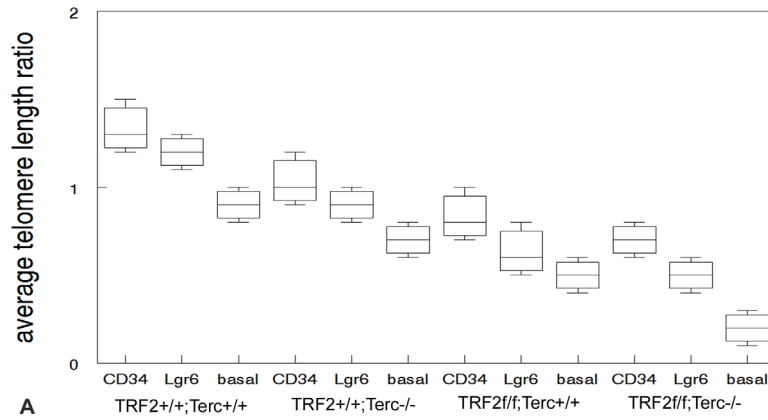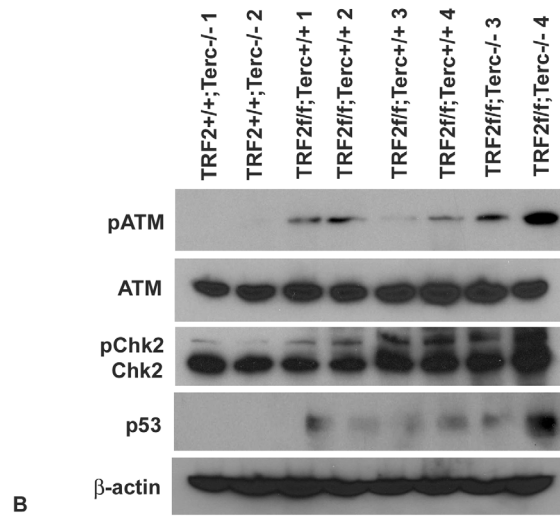

**Supplementary Figure 2: (A)** Average telomere length ratios in CD34<sup>+</sup> stem, Lgr6<sup>+</sup> stem, and basal cells from K14Cre;TRF2<sup>+/+</sup>;Terc<sup>+/+</sup>, K14Cre;TRF2<sup>+/+</sup>;Terc<sup>-/-</sup>, K14Cre;TRF2<sup>f/f</sup>;Terc<sup>+/+</sup>, and K14Cre;TRF2<sup>f/f</sup>;Terc<sup>-/-</sup> primary SCC were determined by qPCR. Error bars represent SEM. **(B)** Phospho-ATM, phospho-Chk2, and p53 expression in K14Cre;TRF2<sup>+/+</sup>;Terc<sup>-/-</sup>, K14Cre;TRF2<sup>f/f</sup>;Terc<sup>+/+</sup>, and K14Cre;TRF2<sup>f/f</sup>;Terc<sup>-/-</sup> primary SCC is shown by western blot. β-actin expression was used to control for equal loading of each lane. Representative blots are shown.

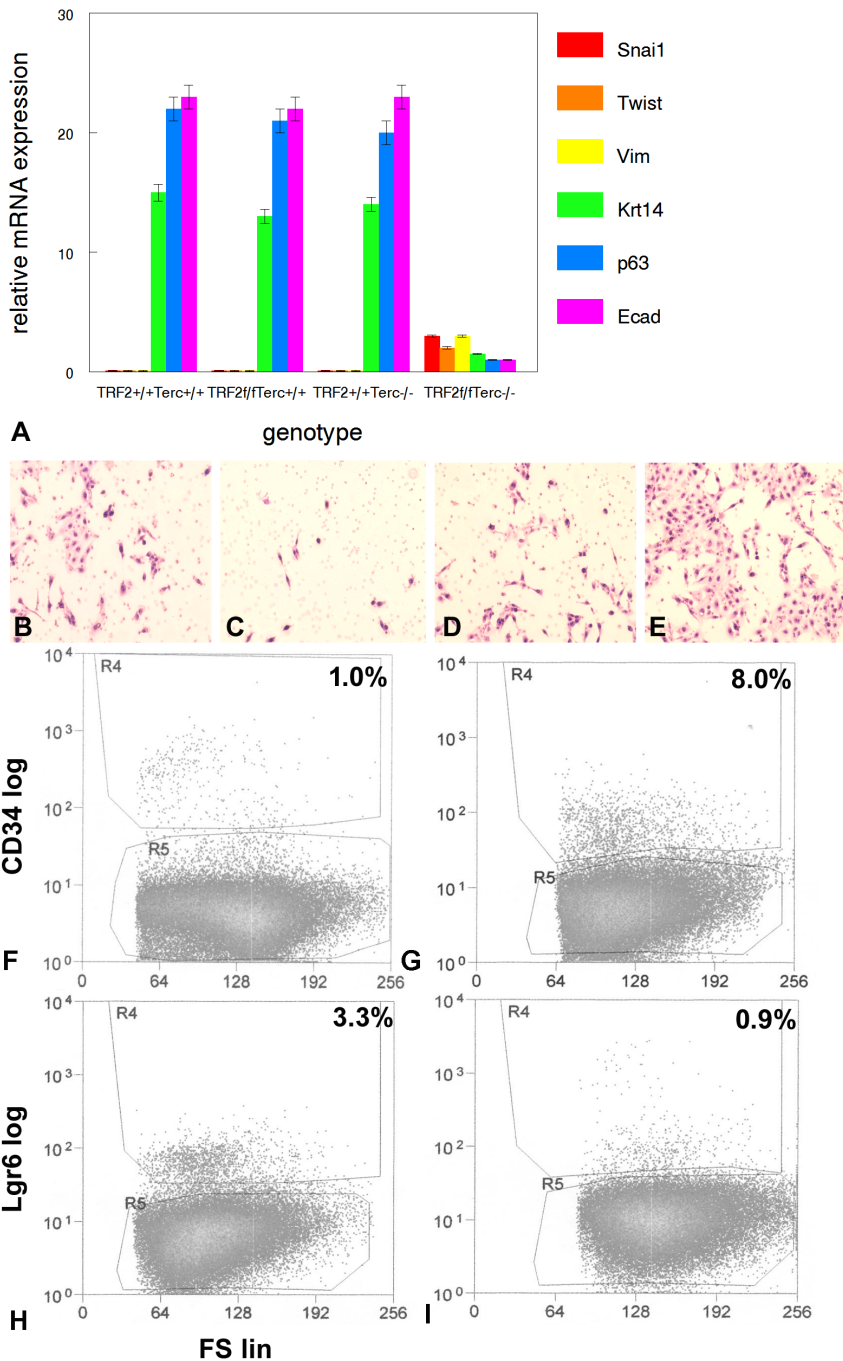

**Supplementary Figure 3:** (A) Expression of EMT (Snai1, Twist, Vim) and epithelial differentiation (Krt14, p63, Ecad) mRNAs in K14Cre;TRF2<sup>+/+</sup>Terc<sup>+/+</sup>, K14Cre;TRF2<sup>f/f</sup>Terc<sup>+/+</sup>, K14Cre;TRF2<sup>+/+</sup>Terc<sup>-/-</sup>, and K14Cre;TRF2<sup>f/f</sup>Terc<sup>-/-</sup> SCC. In vitro invasion analysis using cancer cells from K14Cre;TRF2<sup>+/+</sup>Terc<sup>+/+</sup> (B), K14Cre;TRF2<sup>+/+</sup>Terc<sup>-/-</sup> (C), K14Cre;TRF2<sup>f/f</sup>Terc<sup>+/+</sup> (D), and K14Cre;TRF2<sup>f/f</sup>Terc<sup>-/-</sup> (E) genotypes. FACS analysis of CD34<sup>+</sup> cancer stem cells from K14Cre;TRF2<sup>+/+</sup>Terc<sup>-/-</sup> (F) and K14Cre;TRF2<sup>f/f</sup>Terc<sup>+/+</sup> (G) SCC. FACS analysis of Lgr6<sup>+</sup> cancer stem cells from K14Cre;TRF2<sup>+/+</sup>Terc<sup>-/-</sup> (H) and K14Cre;TRF2<sup>f/f</sup>Terc<sup>+/+</sup> (I) SCC. Fluorescence is shown by log scale (y axis) and forward scatter is shown by linear scale (x axis). The percent positive cells in each group are shown.

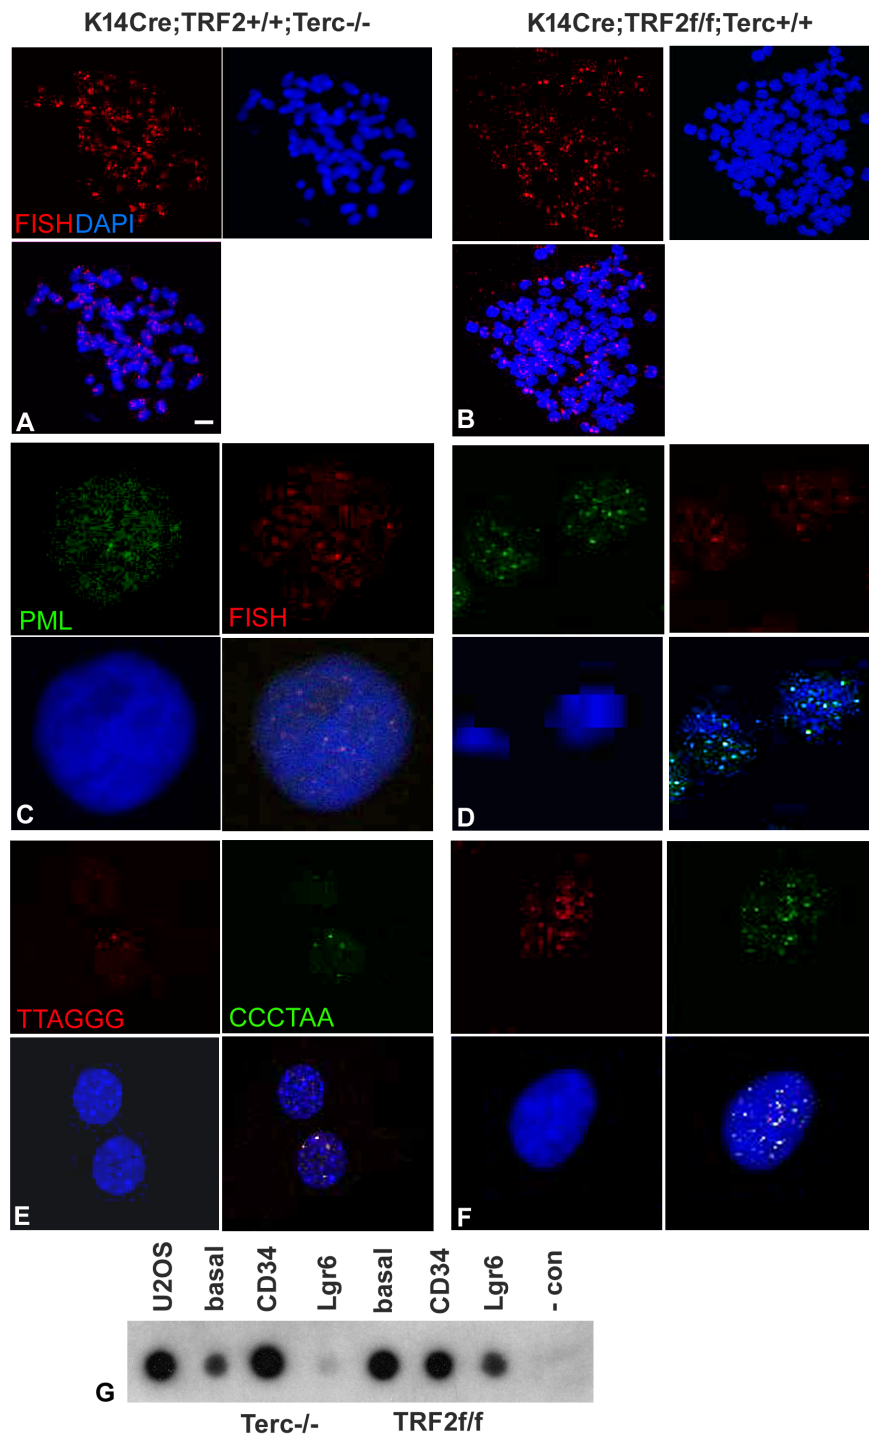

**Supplementary Figure 4: TRF2 and Terc null mutations induce chromosomal instability and ALT in primary SCC.** (A) Telomeres are shown by FISH (Cy3) on metaphase chromosomal spreads of SCC cells from K14Cre;TRF2+/+;Terc-/- (A) and K14Cre;TRF2f/f;Terc+/+ (B) mice. Chromosomes were counterstained with DAPI. Scale bar = 2  $\mu$ m. APBs (PML protein shown by immunofluorescence, AlexaFluor 488) at telomeres (shown by fluorescence in situ hybridization, Cy3) in K14Cre;TRF2+/+;Terc-/- (C) and K14Cre;TRF2f/f;Terc+/+ (D) primary tumors are shown. Nuclei were counterstained with DAPI. ALT-associated sister chromatid exchange in K14Cre;TRF2+/+;Terc-/- (E) and K14Cre;TRF2f/f;Terc+/+ (F) SCC cells is shown by CO-FISH. Co-localization of DNA strand specific signals (Cy3, FITC) indicate sister chromatid exchange. Representative photomicrographs are shown. (G) Telomeric circular DNA in sorted CD34+, Lgr6+, and CD34-Lgr6- basal cells from K14Cre;TRF2+/+;Terc-/- and K14Cre;TRF2f/f;Terc+/+ SCC. U2OS cells were used as the positive control, and reactions without genomic DNA or polymerase were used as the negative control.
